# Supplementary material for: Trends and variability of atmospheric PM 2.5 and PM 10−2.5 concentration in the Po Valley, Italy
Source: Copernicus journal article supplement (doi:10.5194/acp-2016-441), 2016-09-26
Supplement: Supplementary file 1 [file acp-2016-441-supplement.pdf]

Table S1: Results of weekly cycle analysis on PM<sub>2.5</sub> and PM<sub>10-2.5</sub>: black dots indicate a significant weekend effect magnitude (WEM) or weekly cycle (WCY) or 7-days periodicity (MTM) at a 95% confidence level. Results shown are from test application on the complete series, winter and summer by grouping data in 7-day weeks (this latter applies only to WEM and WCY).

| Station              | Complete Series |     |     | Winter |     | Summer |     |
|----------------------|-----------------|-----|-----|--------|-----|--------|-----|
|                      | WEM             | WCY | MTM | WEM    | WCY | WEM    | WCY |
| PM <sub>2.5</sub>    |                 |     |     |        |     |        |     |
| Alessandria          |                 |     |     |        |     |        |     |
| Ballirana            |                 | •   |     | •      |     |        |     |
| Bergamo              | •               | •   |     |        |     | •      | •   |
| Besenzone            | •               | •   |     |        |     | •      | •   |
| Biella               |                 | •   |     |        |     |        |     |
| Bologna G.M.         |                 |     |     |        |     |        |     |
| Bologna P.S.F.       |                 | •   |     |        |     | •      | •   |
| Borgofranco          |                 | •   |     |        |     | •      | •   |
| Brescia              | •               | •   |     |        |     | •      | •   |
| Calusco d'Adda       | •               | •   |     |        |     | •      | •   |
| Casirate d'Adda      | •               | •   |     |        |     | •      | •   |
| Castano Primo        |                 | •   |     |        |     |        | •   |
| Chivasso             | •               | •   |     |        |     | •      | •   |
| Cornale              |                 |     |     |        |     |        |     |
| Faenza               |                 | •   |     |        |     |        |     |
| Ferrara              |                 | •   |     |        |     |        |     |
| Forli'               |                 | •   |     |        |     |        | •   |
| Gavello              |                 | •   |     |        |     |        | •   |
| Guastalla            |                 |     | •   |        |     |        | •   |
| Jolanda di Savoia    |                 | •   |     |        |     |        |     |
| Langhirano           |                 | •   |     |        |     |        | •   |
| Leiní                | •               | •   |     |        |     |        |     |
| Lodi                 | •               | •   |     |        |     | •      | •   |
| Mantova              | •               | •   |     |        |     | •      | •   |
| Merate               | •               | •   |     |        |     | •      | •   |
| Milano               | •               | •   |     |        |     | •      | •   |
| Modena               | •               | •   |     |        |     |        | •   |
| Mortara              | •               | •   |     |        |     |        |     |
| Novara               |                 |     |     |        |     |        |     |
| Padova               |                 | •   |     |        |     |        |     |
| Parma                |                 | •   | •   |        |     |        |     |
| Piacenza             |                 |     |     |        |     |        |     |
| Ponti sul Mincio     | •               | •   |     |        |     |        |     |
| Reggio Emilia        | •               | •   |     |        |     | •      |     |
| Rimini               | •               | •   | •   |        |     |        |     |
| San Clemente         |                 |     |     |        |     |        |     |
| Saronno              | •               | •   |     |        |     | •      | •   |
| Schivenoglia         | •               | •   |     |        |     |        |     |
| Seriate              | •               | •   |     |        |     | •      | •   |
| S. Pietro C.         |                 |     |     |        |     |        |     |
| Torino C.            | •               |     |     |        |     |        |     |
| Torino L.            | •               | •   |     |        |     |        | •   |
| Vercelli             |                 | •   |     |        |     |        |     |
| Vinchio              |                 |     |     |        |     |        |     |
| PM <sub>10-2.5</sub> |                 |     |     |        |     |        |     |
| Borgofranco          | •               | •   | •   |        |     | •      | •   |
| Brescia              | •               | •   | •   | •      | •   | •      | •   |
| Calusco d'Adda       | •               | •   |     | •      | •   | •      | •   |
| Casirate d'Adda      | •               | •   | •   | •      |     | •      | •   |
| Lodi                 | •               | •   |     |        |     | •      | •   |
| Mantova              | •               | •   |     |        | •   |        |     |
| Merate               | •               | •   | •   | •      | •   | •      | •   |
| Milano               | •               | •   | •   | •      | •   | •      | •   |
| Parma                | •               | •   | •   |        | •   | •      | •   |
| Ponti sul Mincio     | •               | •   |     | •      | •   | •      | •   |
| Reggio Emilia        | •               | •   |     | •      | •   | •      | •   |
| Rimini               | •               | •   | •   | •      | •   | •      | •   |
| Saronno              | •               | •   |     | •      | •   | •      | •   |
| Schivenoglia         | •               | •   |     |        |     |        | •   |
| Torino L.            | •               | •   |     | •      | •   | •      | •   |

### Complete series

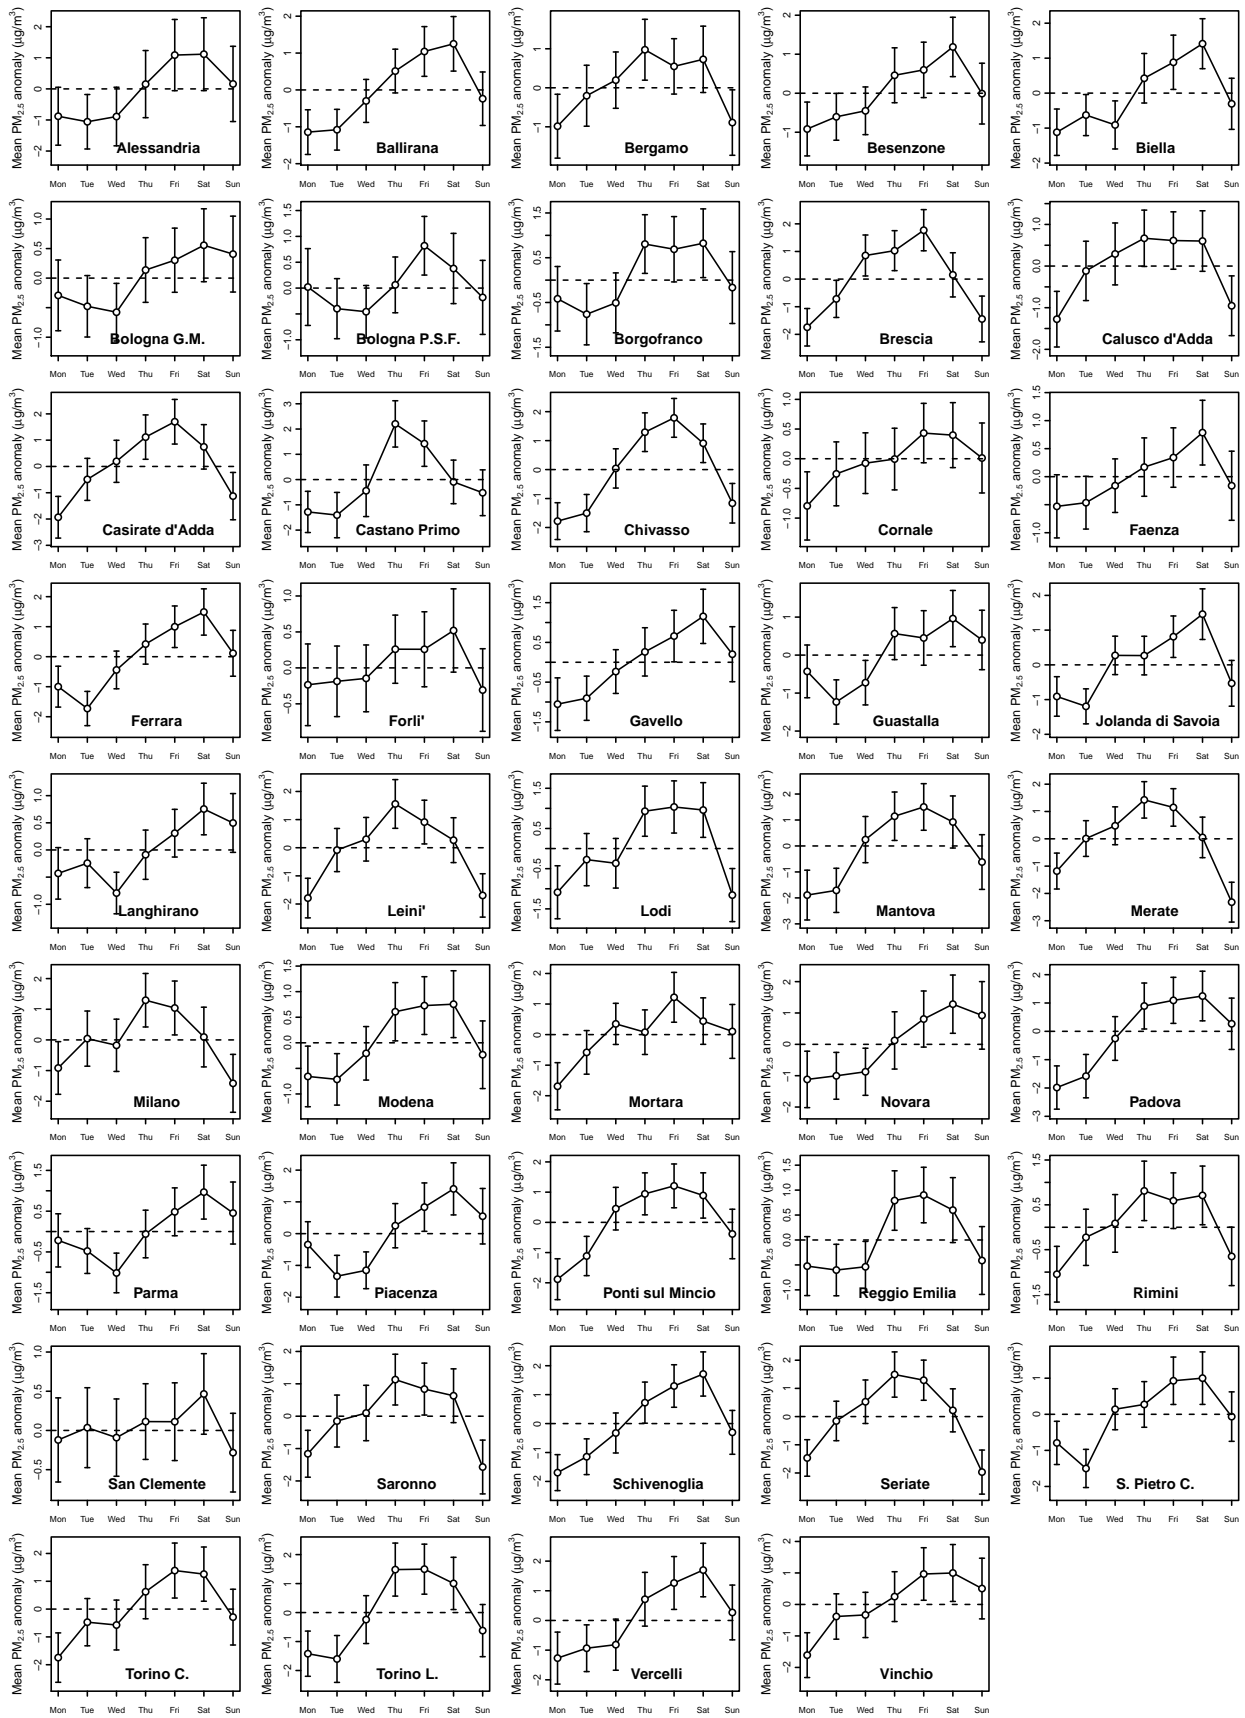

Figure S1: 7 day week mean PM<sub>2.5</sub> anomaly for all sites listed in table 1 (vertical bars indicate standard deviation).

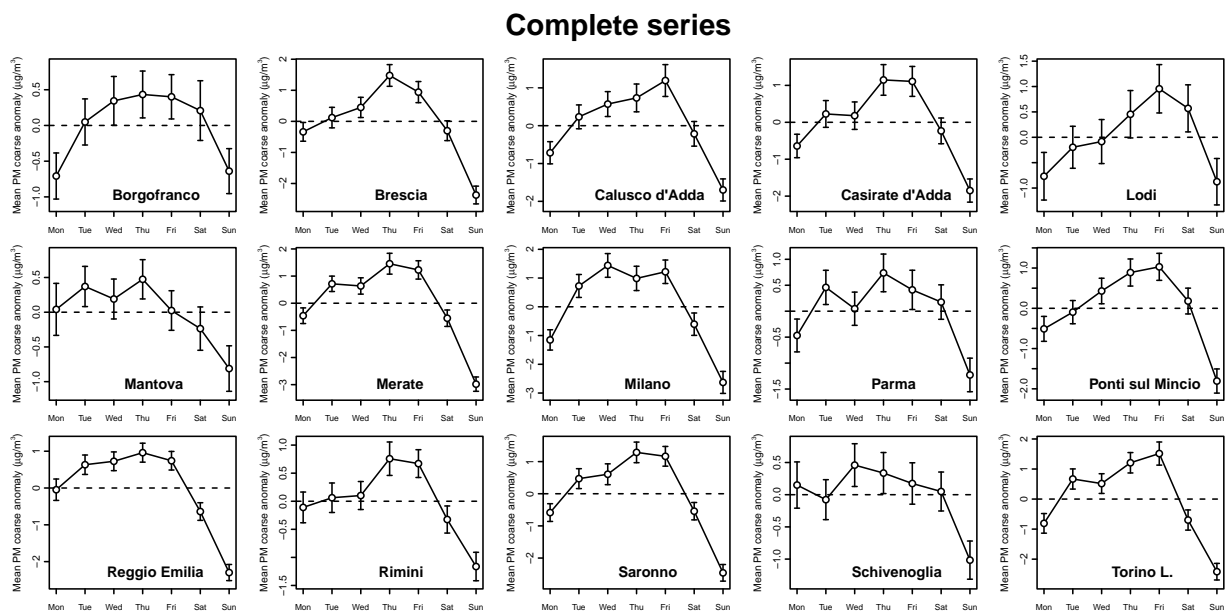

Figure S2: 7 day week mean  $PM_{10-2.5}$  anomaly for all sites listed in boldface in table 1 (vertical bars indicate standard deviation).

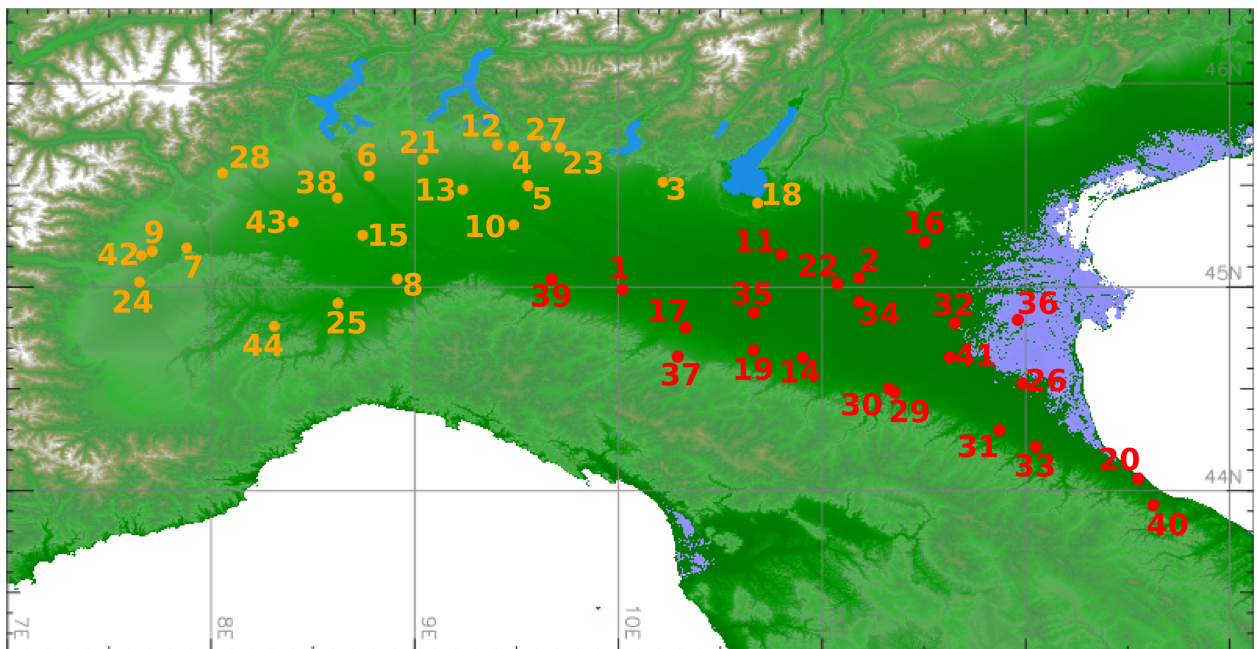

Figure S3: Map result for cluster analysis using partition around medoids algorithm: sites within the same cluster have the same colour. Results of cluster analysis using a divisive algorithm are in Figure 1. Key for ID number is found in Table 1. More details are in sections 2.3 and 3.3.

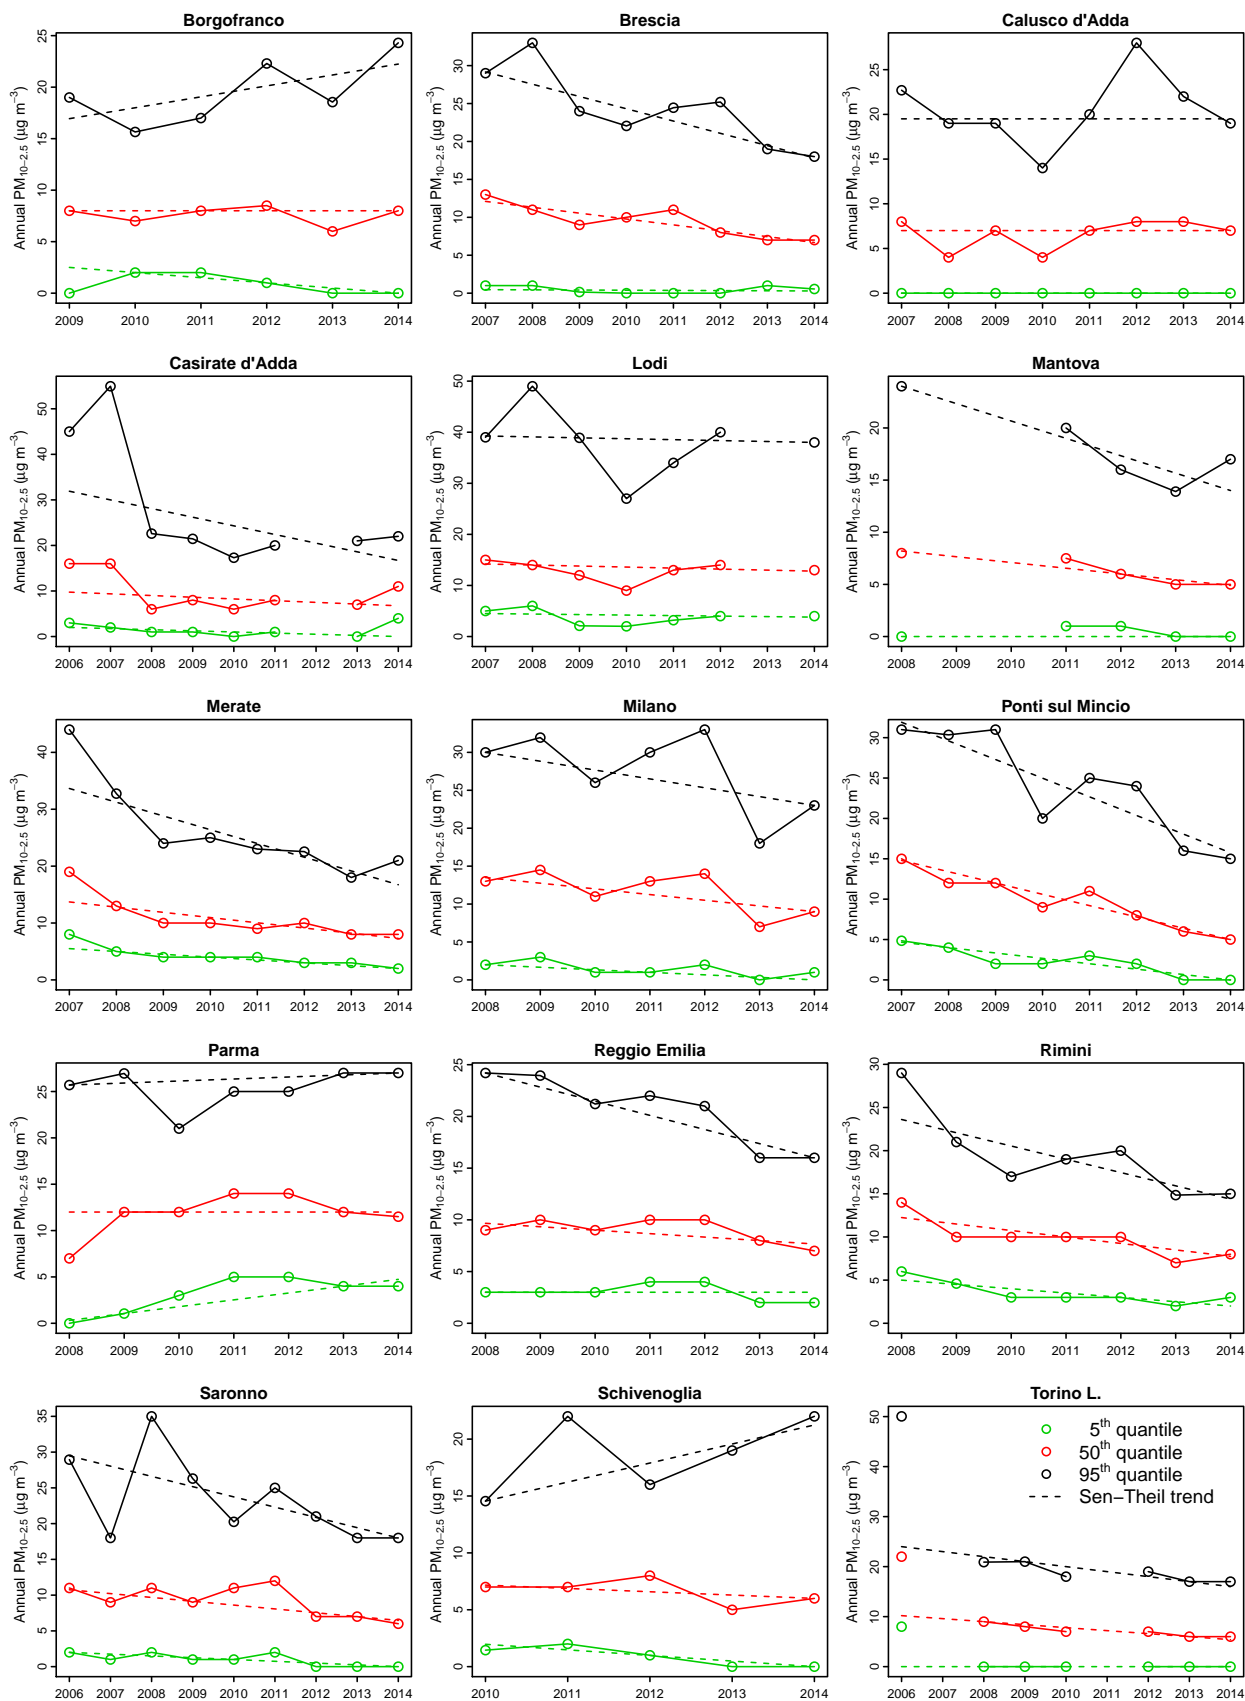

Figure S4: Annual quantile and Sen-Theil trend for daily PM<sub>10-2.5</sub>. Slope estimate and Significance are found in table 3.

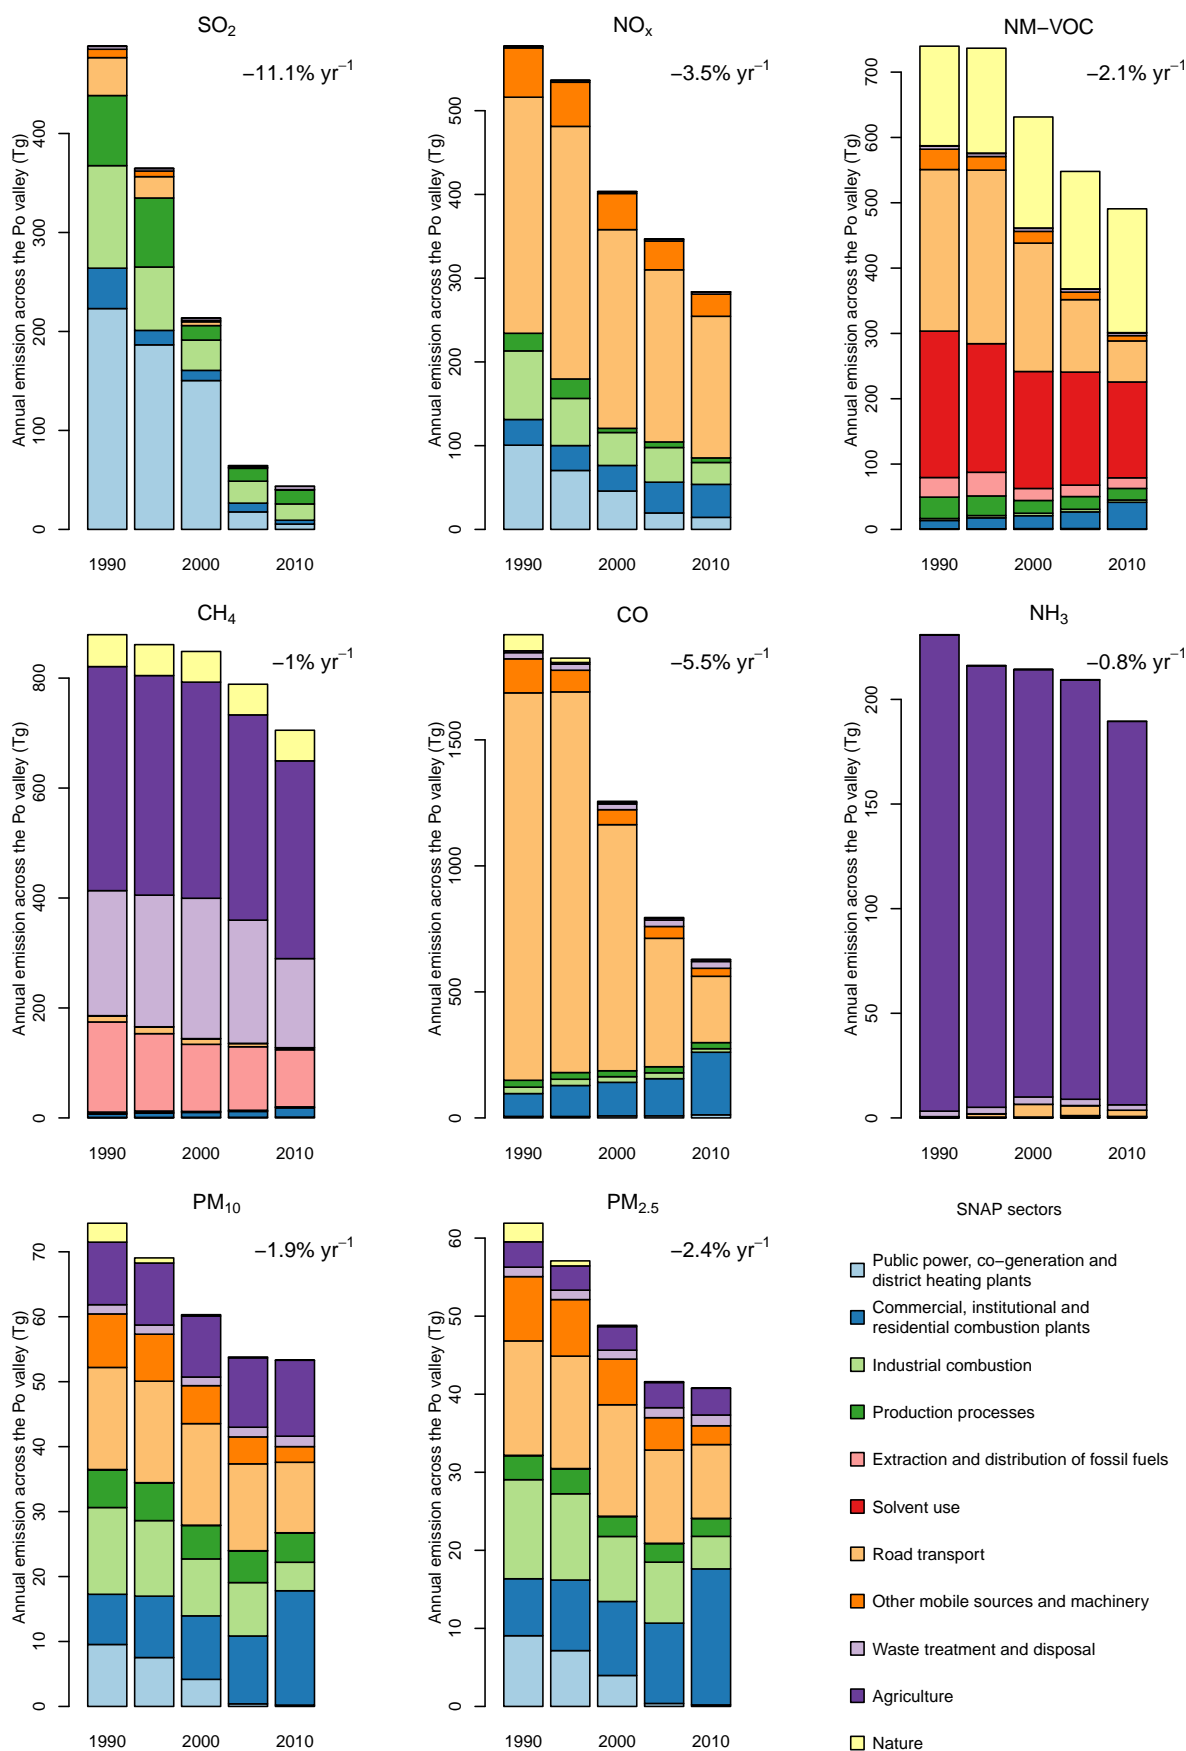

Figure S5: Emissions of selected compounds from all provinces on the Po valley, segregated by SNAP factor, over the period 1990–2010.

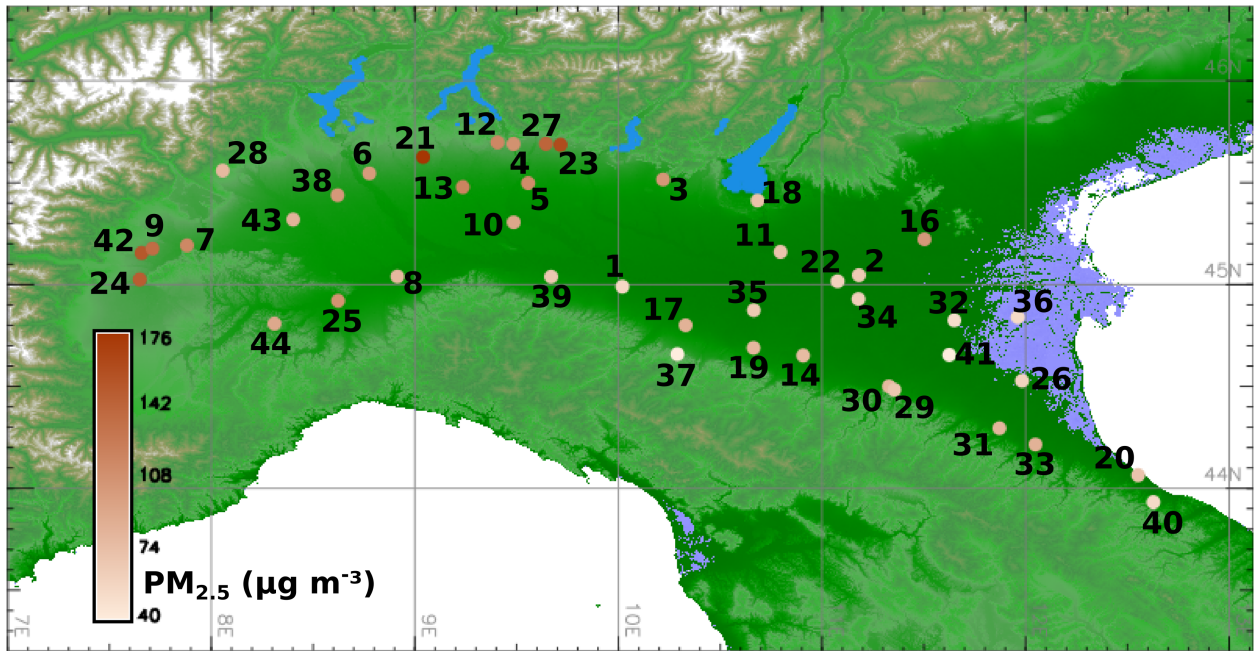

Figure S6: Maximum daily PM<sub>2.5</sub> observed over the Po valley over the January pollution episode.

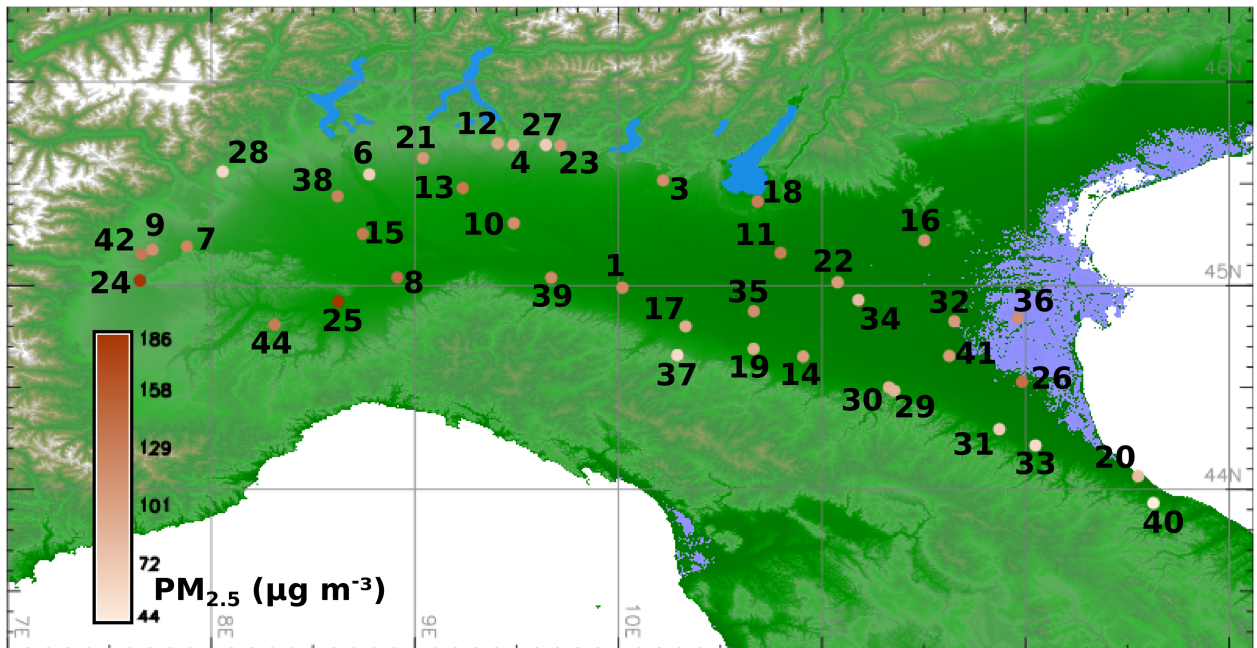

Figure S7: Maximum daily PM<sub>2.5</sub> observed over the Po valley over the February pollution episode.
